# Supplementary material
Source: bioRxiv or medRxiv preprint supplement (https://www.biorxiv.org/highwire/filestream/85662/field_highwire_adjunct_files/0/279026-1.pdf)
Supplement: Supplementary file [file 279026-1.pdf]

1  
2  
3  
4  
5  
6  
7  
8  
9  
10  
11  
12

**Supplemental Information for**

**Anti-CRISPR phages cooperate to overcome CRISPR-Cas immunity**

Mariann Landsberger<sup>1</sup>, Sylvain Gandon<sup>2</sup>, Sean Meaden<sup>1</sup>, H  l  ne Chabas<sup>1§</sup>, Angus  
Buckling<sup>1</sup>, Edze R. Westra<sup>1\*</sup> and Stineke van Houte<sup>1\*</sup>

\* Correspondence: [westra.edze@gmail.com](mailto:westra.edze@gmail.com), [vanhoute.stineke@gmail.com](mailto:vanhoute.stineke@gmail.com).

**This PDF file includes:**

Supplementary Figures 1 – 4

Supplementary information on mathematical modelling

13 **Supplementary figures**

14

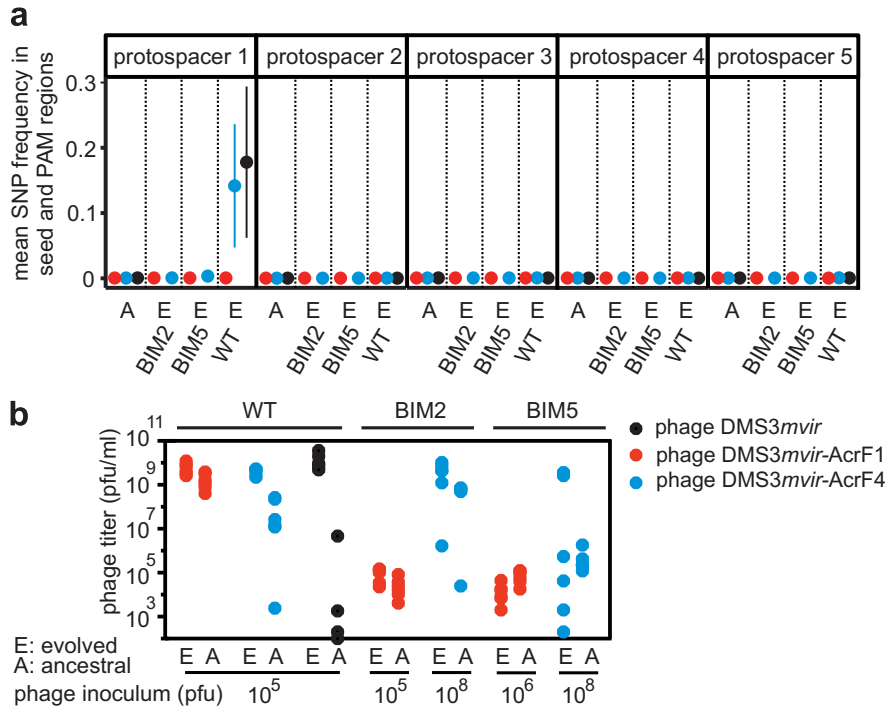

15

16

17 **Supplementary Figure 1.** Epidemiological tipping points cannot be explained by  
 18 phage evolution (related to Figure 2). (a) Deep sequencing of protospacer sequences  
 19 of phages DMS3*mvir* (black data points), DMS3*mvir*-AcrF1 (red data points) or  
 20 DMS3*mvir*-AcrF4 (blue data points), either ancestral (A) or evolved on WT, BIM2 or  
 21 BIM5 hosts (DMS3*mvir* only on WT). Protospacer 1 is targeted by WT, BIM2 and BIM5,  
 22 protospacer 2 is targeted by BIM2 and BIM5, and protospacers 3, 4 and 5 are targeted  
 23 by BIM5. Mean SNP frequency across the seed and PAM region (in total 10  
 24 nucleotides) of each protospacer is shown, error bars indicate the 95% c.i. (b) Density-  
 25 dependent epidemiological tipping points are not due to phage evolution. Viral titers at  
 26 24 hpi of phage DMS3*mvir* (black data points), DMS3*mvir*-AcrF1 (red data points) or  
 27 DMS3*mvir*-AcrF4 (blue data points) on bacteria PA14 WT, BIM2 or BIM5. Below each  
 28 diagram is indicated which phage amounts (pfus) were added in the experiment. A  
 29 indicates ancstral phage; E indicates evolved phage (isolated from the experiments  
 30 depicted in Fig. 2). Each dot represents an independent biological replicate ( $n=6$ ). The  
 31 limit of detection is 200 pfu/ml.

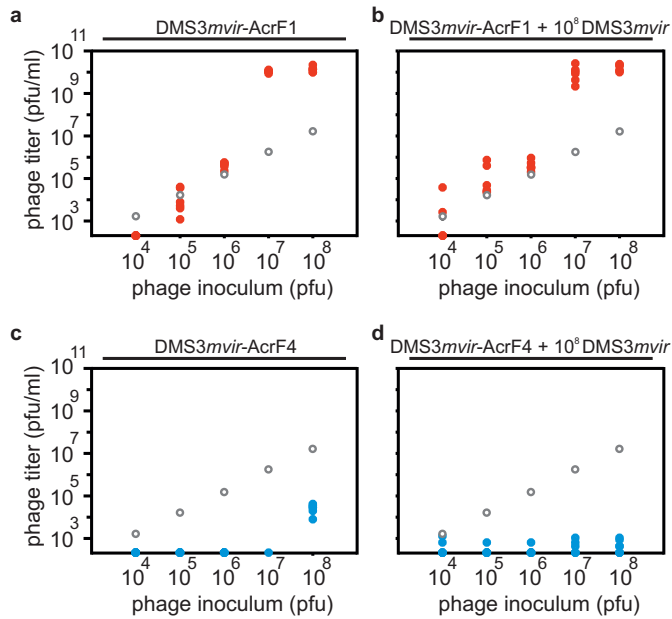

32

33

34 **Supplementary Figure 2.** Epidemiological tipping points are not due to Csy-complex  
 35 sequestration by WT phage (related to Figure 3). (a) Viral titers at 24 hpi with 10<sup>4</sup>, 10<sup>5</sup>,  
 36 10<sup>6</sup>, 10<sup>7</sup> or 10<sup>8</sup> pfus DMS3mvir-AcrF1. (b) Viral titers at 24 hpi with 10<sup>4</sup>, 10<sup>5</sup>, 10<sup>6</sup>, 10<sup>7</sup> or  
 37 10<sup>8</sup> pfus DMS3mvir-AcrF1 in the presence of 10<sup>8</sup> pfus DMS3mvir. (c) Viral titers at 24  
 38 hpi with 10<sup>4</sup>, 10<sup>5</sup>, 10<sup>6</sup>, 10<sup>7</sup> or 10<sup>8</sup> pfus DMS3mvir-AcrF4 (d) Viral titers at 24 hpi with 10<sup>4</sup>,  
 39 10<sup>5</sup>, 10<sup>6</sup>, 10<sup>7</sup> or 10<sup>8</sup> pfus DMS3mvir-AcrF4 in the presence of 10<sup>8</sup> pfus DMS3mvir. Grey  
 40 circles indicate the phage titers (pfu/ml) at the start of the experiment (corresponding  
 41 to the addition of 10<sup>4</sup>, 10<sup>5</sup>, 10<sup>6</sup>, 10<sup>7</sup> or 10<sup>8</sup> pfus). Colored points represent phage titers  
 42 at 24 hpi; each data point represents an independent biological replicate ( $n=6$ ). The  
 43 limit of detection is 200 pfu/ml.

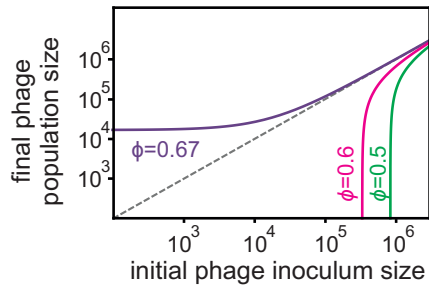

44

45 **Supplementary Figure 3.** Partial immunity alone cannot explain the observed  
 46 epidemiological tipping points (related to Figure 4). Model predictions of the effect of  
 47 initial Acr-phage inoculum density on the phage density after 24h of incubation for  
 48 different values of Acr strength when no immunosuppressive state  $S$  is assumed in the  
 49 model ( $\phi = 0.67, 0.6$  and  $0.5$ ; purple, magenta, green respectively); other parameter  
 50 values:  $B = 5, \alpha = 0.001, \gamma = 20, \rho = 0.7$ . Grey line corresponds to the initial amount of  
 51 phage and values below this line indicate a lack of phage amplification.

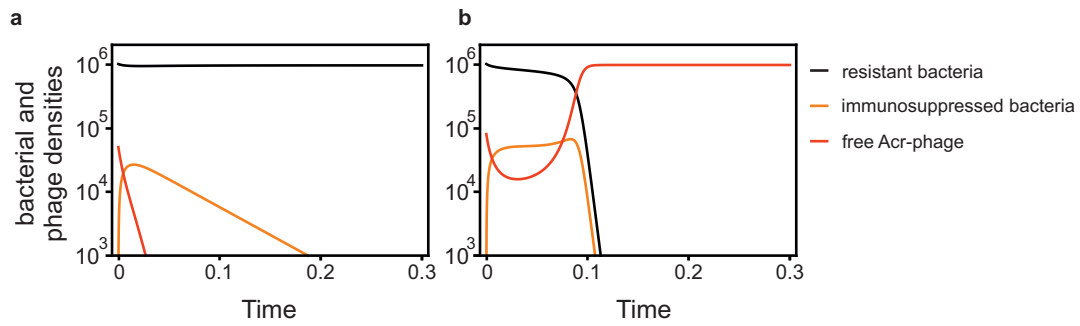

52

53

54 **Supplementary Figure 4.** Model predictions of the temporal population dynamics of  
 55 Acr-phage and resistant and immunosuppressed hosts (related to Figure 5). Model  
 56 predictions for the densities of resistant bacteria (black), immunosuppressed bacteria  
 57 (orange) and phages (red) across time for two initial inoculum sizes: **(a)**  $V(0)=5 \cdot 10^4$ ,  
 58 **(b)**  $V(0)= 8 \cdot 10^4$ . Other parameter values:  $B = 5$ ,  $\alpha = 0.001$ ,  $\gamma = 20$ ,  $\rho = 0.7$ .

59 **Supplemental information**

60 *Mathematical modelling*

61 We develop an epidemiological model to understand the dynamics of bacteriophages  
62 that carry an anti-CRISPR mechanism (Acr) in a resistant host population. Resistant  
63 bacteria may be in a normal state (the density of these bacteria is noted  $R(t)$ ) or in a  
64 immunosuppressed state (the density of these bacteria is noted  $S(t)$ ).

65 Initially the host population is homogeneous and the density of resistant bacteria is  
66  $R(0)$ . Then an inoculum of free phage particles with density  $V(0)$  is introduced in the  
67 host population. Free phage particles adsorb to the bacteria at a rate  $\alpha$ . When a free  
68 phage adsorbs to a resistant bacteria three outcomes are possible: (i) The phage is  
69 destroyed and there is no change in bacterial resistance with probability  $\rho$ . In other  
70 words  $\rho$  is a measure of bacteria resistance ( $\rho$  increases with the number of spacers  
71 targeting the phage), (ii) The phage is not destroyed because of its Acr activity with  
72 probability  $(1 - \rho)\phi$  which leads to cell lysis and the release of  $B$  new phage particles.  
73 The efficacy of Acr activity is thus measured with  $\phi$ . (iii) Finally, the phage fails to  
74 complete its lytic cycle but blocks bacterial immunity and the bacteria becomes  
75 immunosuppressed with probability  $(1 - \rho)(1 - \phi)$ . This state is reversible and  
76 immunosuppressed bacteria become resistant again at rate  $\gamma$ . If an  
77 immunosuppressed bacteria is exposed to a phage, the absence of immunity allows  
78 the phage to complete its lytic life cycle. This yields the following set of ordinary  
79 differential equations (see **Fig. 4a**):

$$\begin{aligned}\dot{R}(t) &= -(a(1 - \rho)V(t))R(t) + \gamma S(t) \\ \dot{S}(t) &= a(1 - \rho)(1 - \phi)V(t)R(t) - (\gamma + aV(t))S(t) \\ \dot{V}(t) &= a(1 - \rho)\phi B V(t)R(t) + aB V(t)S(t) - a(S(t) + R(t))V(t)\end{aligned}\tag{1}$$

80

81 Initially there are no immunosuppressed bacteria around (i.e.  $S(0) = 0$ ) and if a few  
82 virus particles are introduced the phage population will increase if the Acr activity is  
83 higher than a threshold value:

$$\phi > \phi_0 = \frac{1}{(1 - \rho)B}\tag{2}$$

84 In other words, when  $\phi$  is low and  $\rho$  is high the phage population cannot take off when  
85 the inoculum of the phage is small (**Fig. 4b,c**).

86 Yet, if one introduces a sufficiently high density of Acr-phages they will shut down the  
87 immunity of the bacterial population and will increase the density of  
88 immunosuppressed bacteria. At time  $T$  the following condition may be verified

$$\phi > \phi_0 - \frac{S(T)(B - 1)}{R(T)(1 - \rho)B} \quad (3)$$

89 and the phage population may thus take off for lower values of Acr activity. Note that  
90 conditions (2) and (3) indicate a range of values of  $\phi$  where the epidemiological  
91 outcome depends on the initial density of the virus (epidemiological bistability). Note  
92 that the threshold value of the density of virus leading to an epidemic depends also on  
93 the duration of the immunosuppression (see **Fig. 4d**).

94 In **Fig. S4** we illustrate the epidemiological dynamics taking place when the initial  
95 density of the phage is either below or above the threshold value of the phage  
96 inoculum. Below the threshold (**Fig. S4a**), the density of immunosuppressed bacteria  
97 does not reach a high enough level to satisfy condition (3) and the phage population  
98 goes extinct. Above the threshold (**Fig. S4b**), the immunosuppressed bacteria reaches  
99 a high enough density, condition (3) is verified and the phage population can exploit  
100 the whole bacteria population.
